# Supplementary material
Source: PubMed Central journal article supplement (PMC7519469)

# Supplementary fig. 1

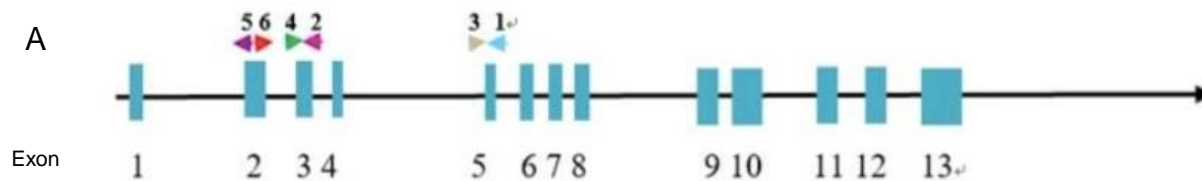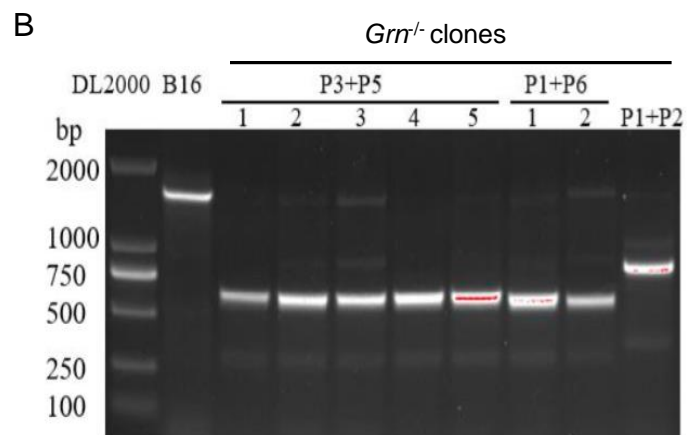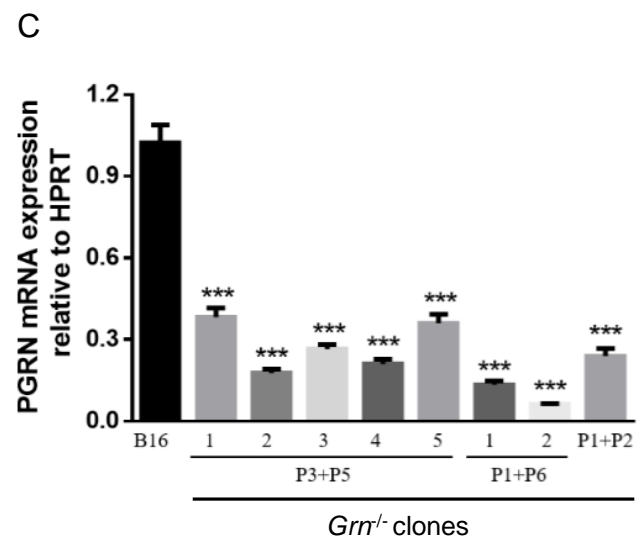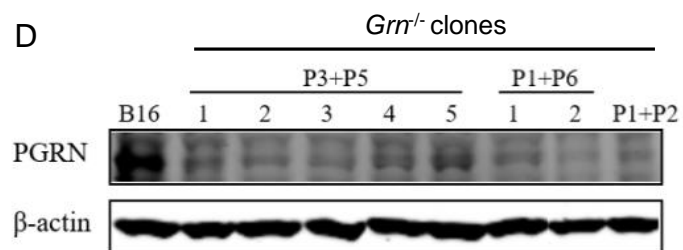

## Supplementary fig. 2

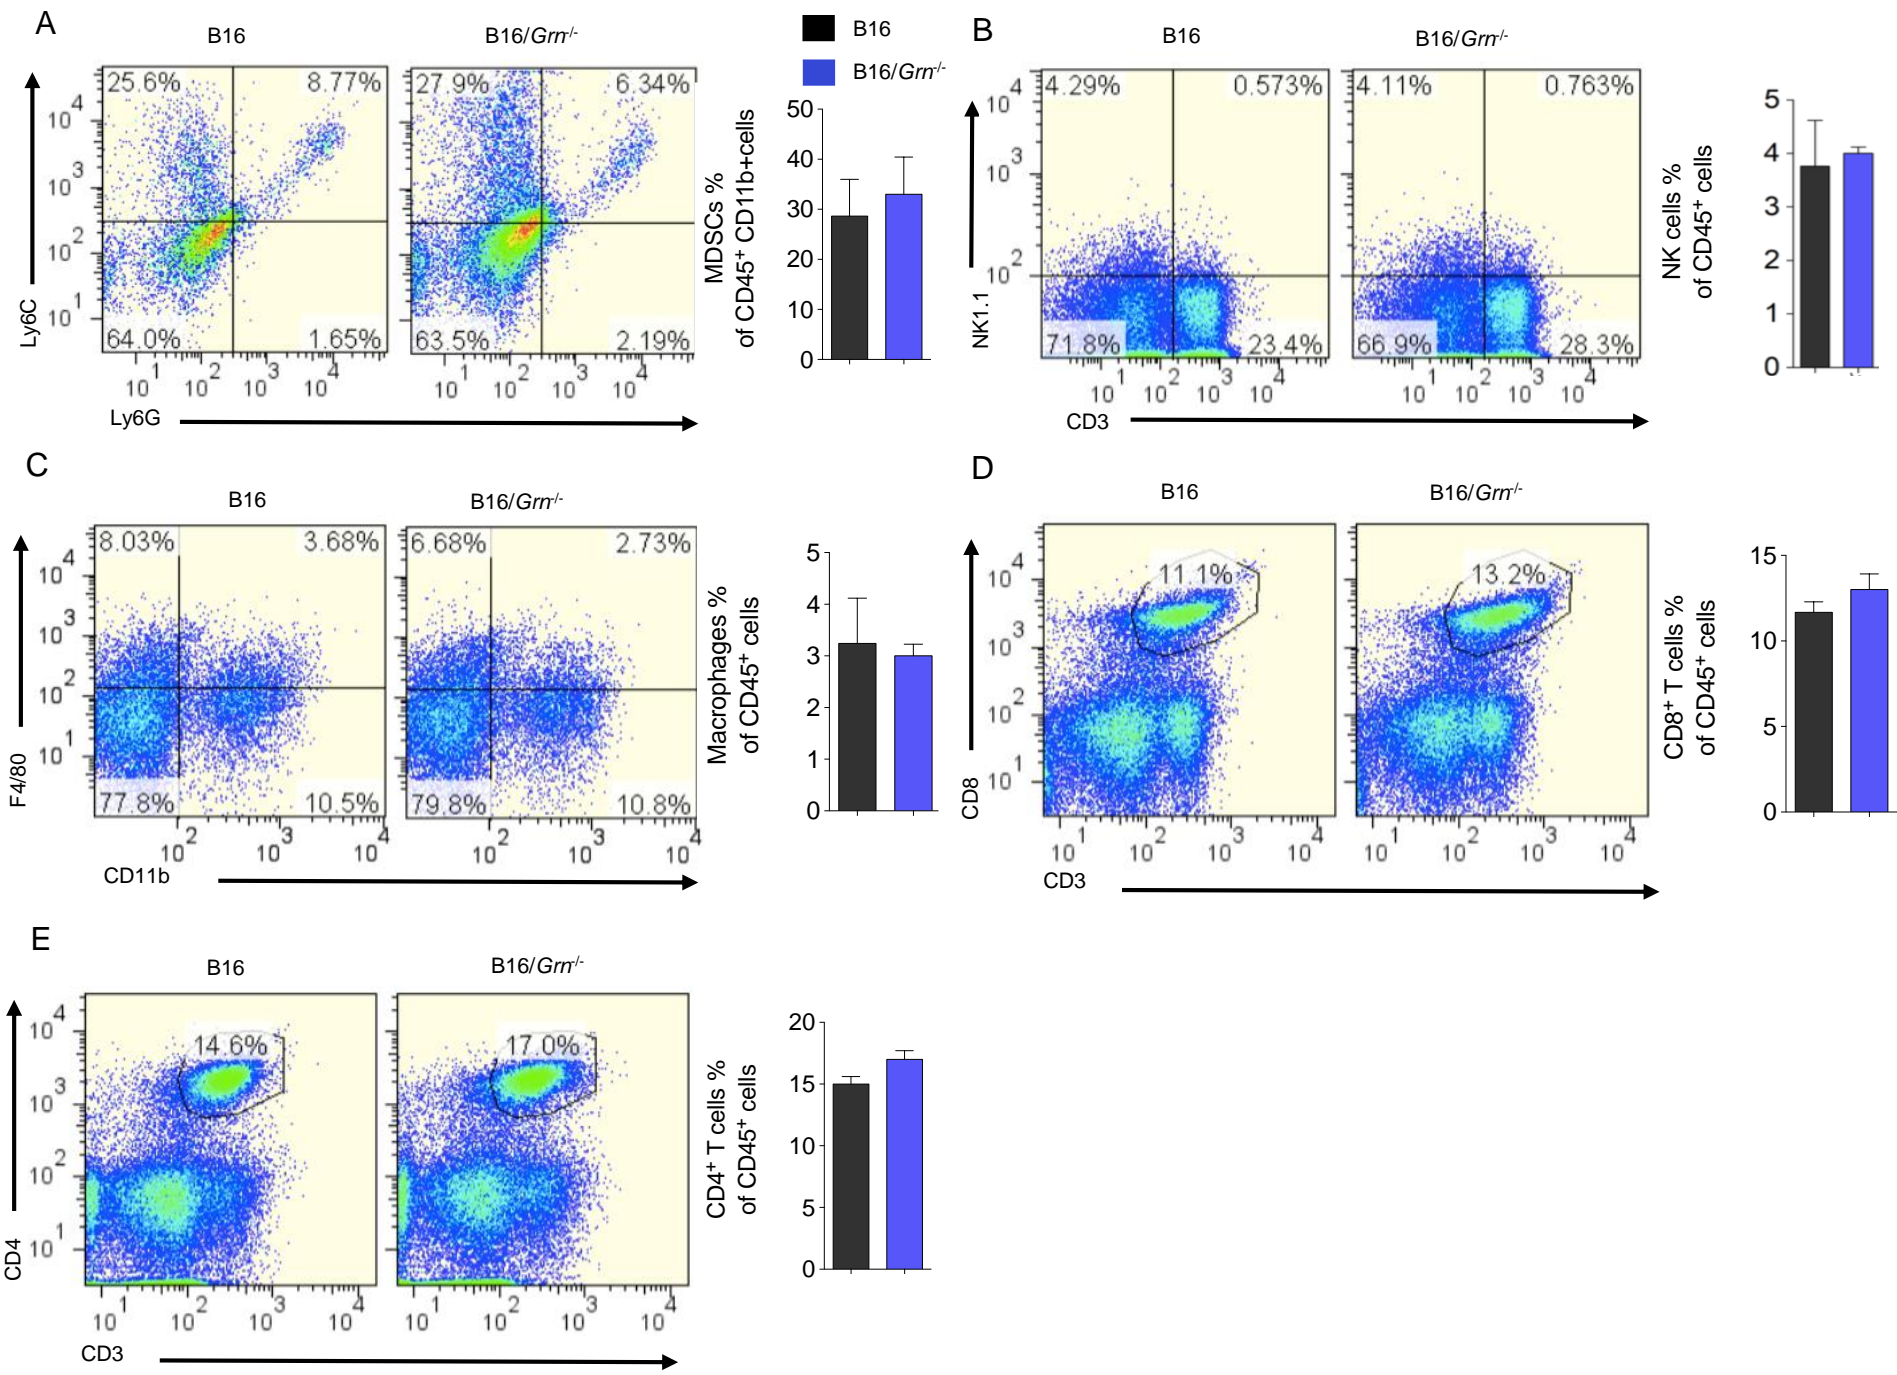

Supplementary fig. 3

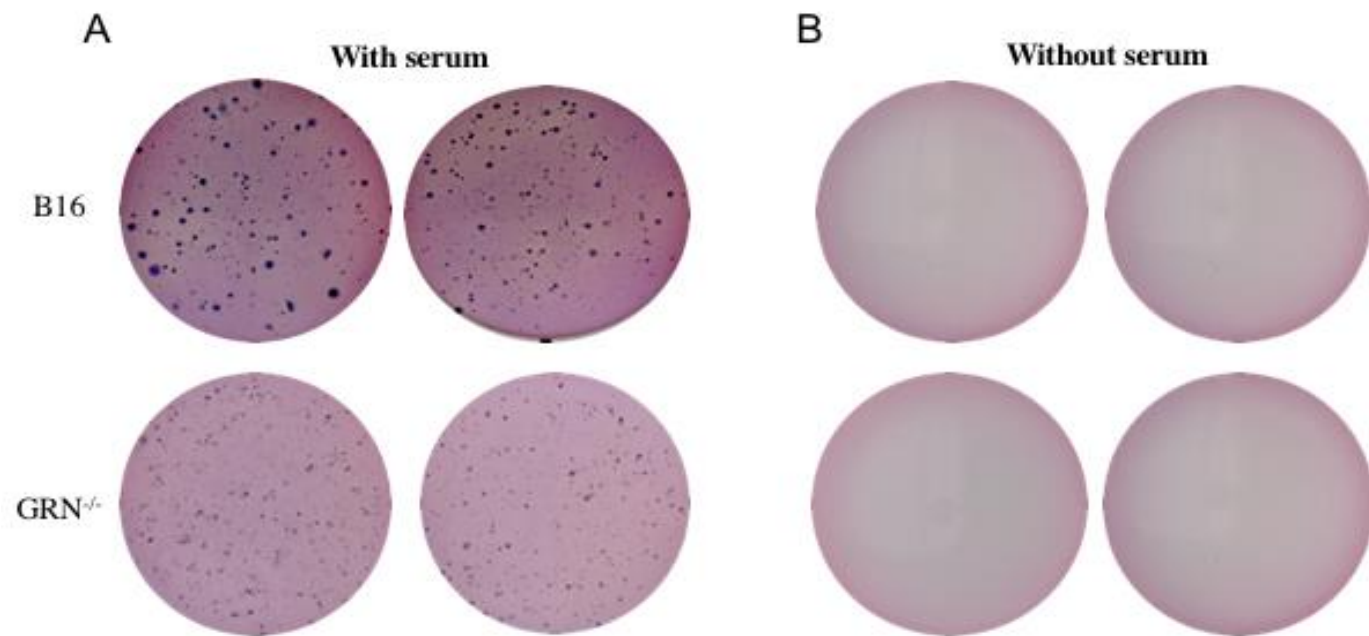

# Supplementary fig. 4

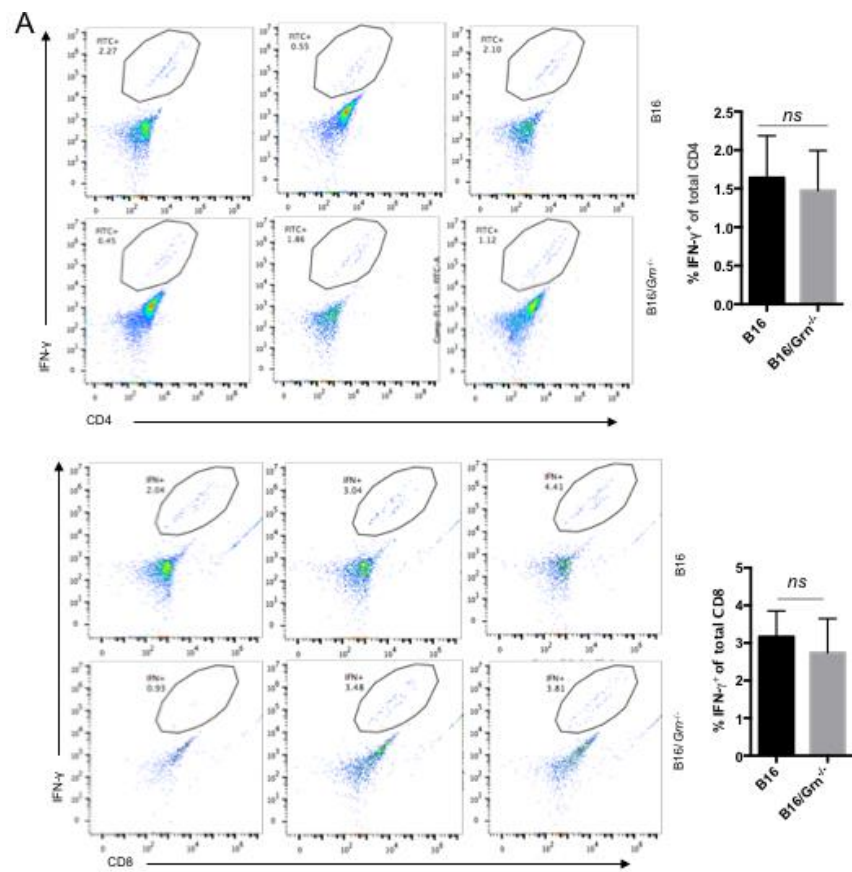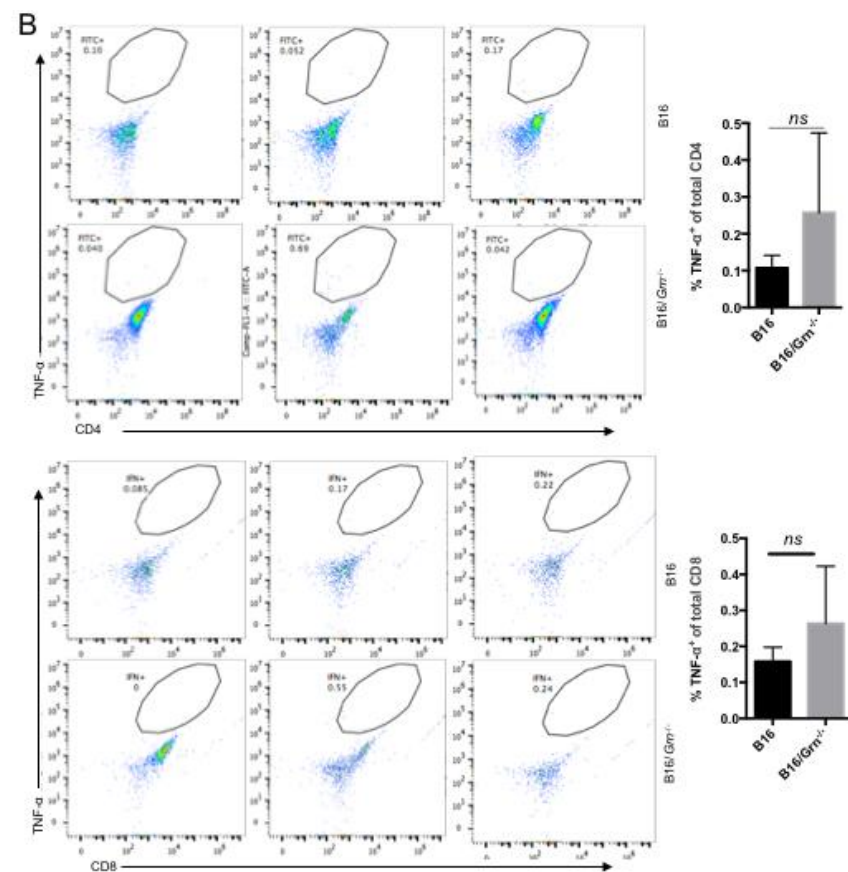

Supplementary fig. 5

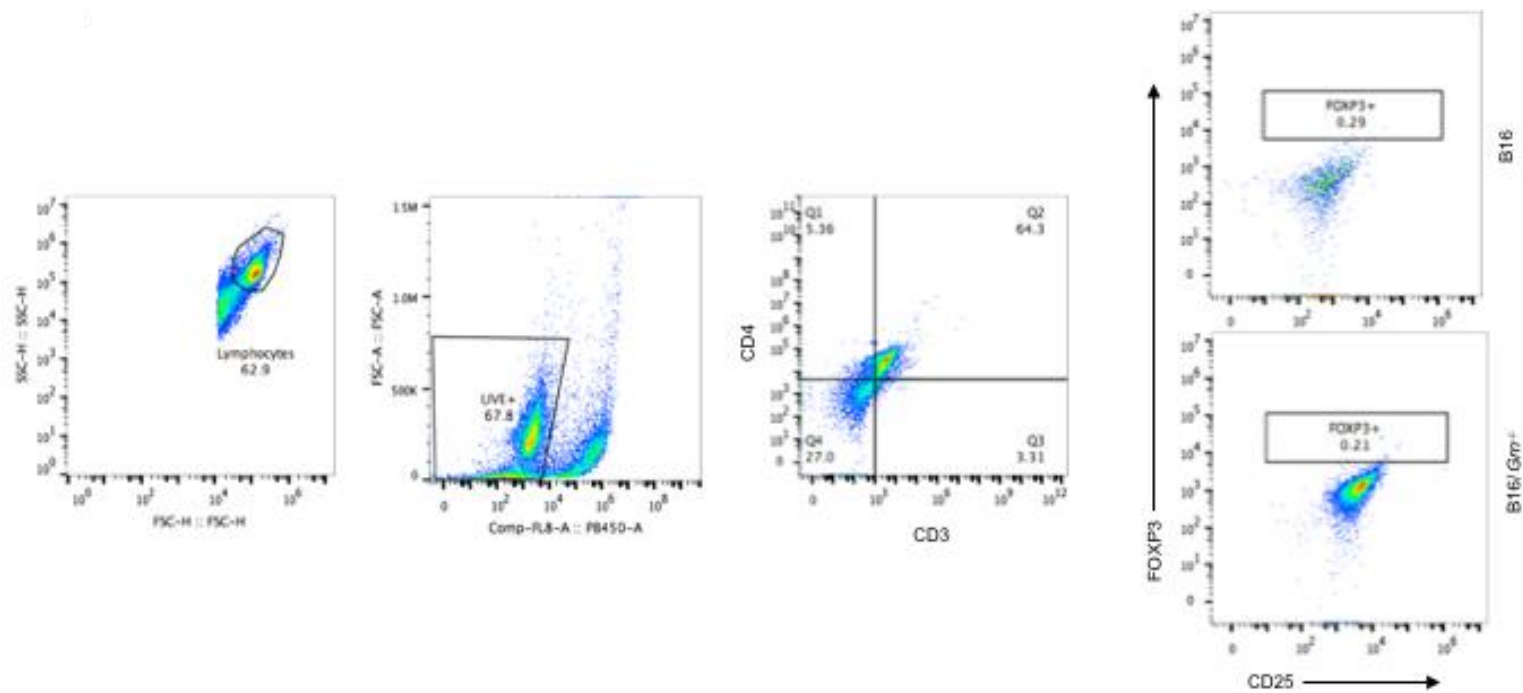

Supplement: NIHMS1629950-supplement-1.pdf [file NIHMS1629950-supplement-1.pdf]
